# Supplementary material for: Impact of Dose, Sex, and Strain on Oxaliplatin-Induced Peripheral Neuropathy in Mice
Source: PubMed Central journal article supplement (PMC8915759; doi:10.3389/fpain.2021.683168), 2021-07-22
Supplement: Table_1.pdf [file Table_1.pdf]

**A**

| Measurement                 | Males vs. Females | Treatment        | Sex x Treatment                     |
|-----------------------------|-------------------|------------------|-------------------------------------|
| Percent Body Weight Change  | C57BL/6J          | Veh vs Low Dose  | F (1, 52) = 0.03851; P=0.8452       |
|                             |                   | Veh vs High Dose | F (1, 52) = 6.360; P= <b>0.0148</b> |
|                             | BALB/cJ           | Veh vs Low Dose  | F (1, 31) = 1.400; P=0.2458         |
|                             |                   | Veh vs High Dose | F (1, 33) = 0.04765; P=0.8286       |
| Mechanical Hypersensitivity | C57BL/6J          | Veh vs Low Dose  | F (1, 53) = 1.122; P=0.2943         |
|                             |                   | Veh vs High Dose | F (1, 55) = 2.472; P=0.1216         |
|                             | BALB/cJ           | Veh vs Low Dose  | F (1, 31) = 0.02937; P=0.8650       |
|                             |                   | Veh vs High Dose | F (1, 31) = 0.03572; P=0.8513       |
| Cold Hypersensitivity       | C57BL/6J          | Veh vs Low Dose  | F (1, 28) = 0.2260; P=0.6382        |
|                             |                   | Veh vs High Dose | F (1, 28) = 0.2858; P=0.5972        |
| Locomotor Activity          | C57BL/6J          | Veh vs Low Dose  | F (1, 224) = 0.5713; P=0.4505       |
|                             |                   | Veh vs High Dose | F (1, 226) = 1.116; P=0.2919        |
| Light/Dark Box              | C57BL/6J          | Veh vs Low Dose  | F (1, 116) = 0.2847; P=0.5947       |
|                             |                   | Veh vs High Dose | F (1, 116) = 0.5115; P=0.4759       |
|                             | BALB/cJ           | Veh vs Low Dose  | F (1, 29) = 0.7639; P=0.3893        |
|                             |                   | Veh vs High Dose | F (1, 95) = 2.774; P=0.0991         |
| Sucrose Preference          | C57BL/6J          | Veh vs Low Dose  | F (1, 25) = 0.4840; P=0.4930        |
|                             |                   | Veh vs High Dose | F (1, 36) = 1.721; P=0.1979         |
|                             | BALB/cJ           | Veh vs Low Dose  | F (1, 18) = 0.2419; P=0.6288        |
|                             |                   | Veh vs High Dose | F (1, 19) = 2.439; P=0.1349         |
| Total Fluid Intake          | C57BL/6J          | Veh vs Low Dose  | F (1, 25) = 10.56; P= <b>0.0033</b> |
|                             |                   | Veh vs High Dose | F (1, 36) = 0.1929; P=0.6631        |
|                             | BALB/cJ           | Veh vs Low Dose  | F (1, 19) = 0.03389; 0.8559         |
|                             |                   | Veh vs High Dose | F (1, 19) = 0.005325; 0.9426        |
| Nerve Conduction Amplitude  | BALB/cJ           | Veh vs Low Dose  | F (1, 30) = 0.6407; P=0.4298        |
|                             |                   | Veh vs High Dose | F (1, 31) = 0.7612; P=0.3897        |
| IENF Density                | C57BL/6J          | Veh vs Low Dose  | F (1, 21) = 0.06181; P=0.8061       |
|                             |                   | Veh vs High Dose | F (1, 20) = 0.02172; P=0.8843       |
|                             | BALB/cJ           | Veh vs Low Dose  | F (1, 20) = 0.5786; P=0.4557        |
|                             |                   | Veh vs High Dose | F (1, 20) = 3.549; P=0.0742         |

**B**

| Measurement                 | C57BL/6J vs. BALB/cJ | Treatment        | Strain x Treatment                   |
|-----------------------------|----------------------|------------------|--------------------------------------|
| Percent Body Weight Change  | Males                | Veh vs Low Dose  | F (1, 39) = 1.929; P=0.1728          |
|                             |                      | Veh vs High Dose | F (1, 41) = 21.39; P< <b>0.0001</b>  |
|                             | Females              | Veh vs Low Dose  | F (1, 44) = 0.5143; P=0.4771         |
|                             |                      | Veh vs High Dose | F (1, 44) = 0.3482; P=0.5582         |
| Mechanical Hypersensitivity | Males                | Veh vs Low Dose  | F (1, 46) = 0.008642; P=0.9263       |
|                             |                      | Veh vs High Dose | F (1, 49) = 0.2708; P=0.6051         |
|                             | Females              | Veh vs Low Dose  | F (1, 38) = 0.5723; P=0.4540         |
|                             |                      | Veh vs High Dose | F (1, 37) = 0.4533; P=0.5050         |
| Locomotor Activity          | Males                | Veh vs Low Dose  | F (1, 128) = 3.475; P=0.0646         |
|                             |                      | Veh vs High Dose | F (1, 138) = 1.592; P=0.2092         |
|                             | Females              | Veh vs Low Dose  | F (1, 104) = 0.2369; P=0.6275        |
|                             |                      | Veh vs High Dose | F (1, 104) = 7.881; P= <b>0.0060</b> |
| Light/Dark Box              | Males                | Veh vs Low Dose  | F (1, 23) = 0.1954; P=0.6626         |
|                             |                      | Veh vs High Dose | F (1, 25) = 3.199; P=0.0858          |
|                             | Females              | Veh vs Low Dose  | F (1, 51) = 0.2634; P=0.6100         |
|                             |                      | Veh vs High Dose | F (1, 27) = 0.09829; P=0.7563        |
| Sucrose Preference          | Males                | Veh vs Low Dose  | F (1, 20) = 2.029; P=0.1697          |
|                             |                      | Veh vs High Dose | F (1, 27) = 25.00; P< <b>0.0001</b>  |
|                             | Females              | Veh vs Low Dose  | F (1, 23) = 0.8560; P=0.3645         |
|                             |                      | Veh vs High Dose | F (1, 28) = 2.759; P=0.1079          |
| Total Fluid Intake          | Males                | Veh vs Low Dose  | F (1, 22) = 6.307; P= <b>0.0199</b>  |
|                             |                      | Veh vs High Dose | F (1, 161) = 21.87; P< <b>0.0001</b> |
|                             | Females              | Veh vs Low Dose  | F (1, 23) = 0.4342; P=0.5165         |
|                             |                      | Veh vs High Dose | F (1, 28) = 6.314; P= <b>0.0180</b>  |
| Nerve Conduction Amplitude  | Females              | Veh vs Low Dose  | F (1, 32) = 0.1114; P=0.7408         |
|                             |                      | Veh vs High Dose | F (1, 32) = 5.241; P= <b>0.0288</b>  |
| IENF Density                | Males                | Veh vs Low Dose  | F (1, 21) = 7.535; P= <b>0.0121</b>  |
|                             |                      | Veh vs High Dose | F (1, 20) = 1.342; P=0.2603          |
|                             | Females              | Veh vs Low Dose  | F (1, 20) = 6.995; P= <b>0.0155</b>  |
|                             |                      | Veh vs High Dose | F (1, 20) = 0.0004404; P=0.9835      |
